# Supplementary material for: Chimeric piggyBac transposases for genomic targeting in human cells
Source: PubMed Central journal article supplement — Nucleic Acids Res. 2012 Apr 9;40(14):6978–91. doi: 10.1093/nar/gks309 (PMC3413120; doi:10.1093/nar/gks309), 2012-04-09
Supplement: supp_gks309_nar-00123-h-2012-File015.pdf [file supp_gks309_nar-00123-h-2012-File015.pdf]

## Supporting Information

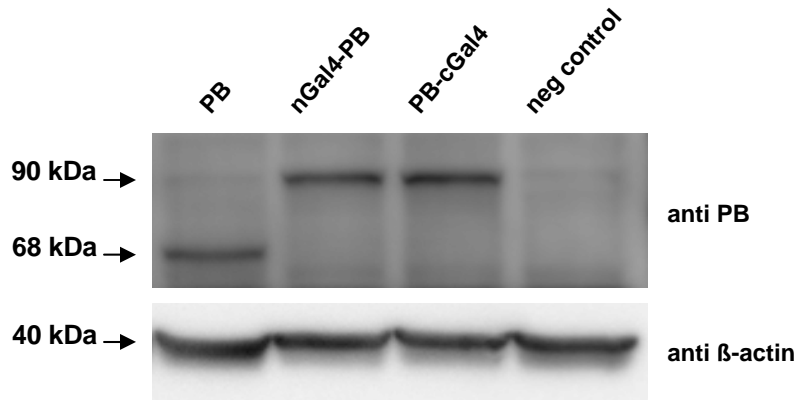

**Figure S1.** Western blot comparison of protein levels of native PB, N-terminal Gal4 PB, and C-terminal Gal4 PB. The larger size for nGal4-PB and PB-cGal4 samples is due to the Gal4 DBD fusion to the transposase. The negative control used was untransfected HEK293 cells.

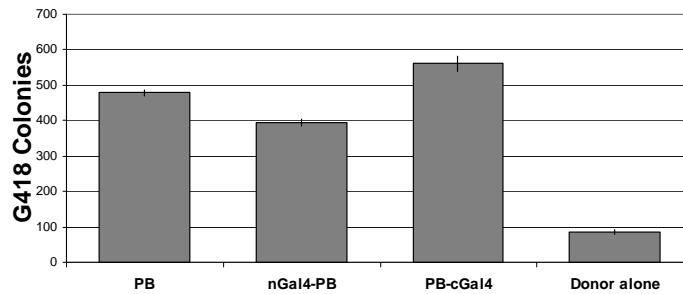

**Figure S2.** Comparison of plasmid integration efficiencies in HEK293 cells. Number of G418 resistant colonies from transfections with native PB, N-terminal Gal4 PB, C-terminal Gal4 PB and transposase-negative control (n=3, mean ± SD).

**Table S1: Nested SB and PB Plasmid Primers**

|                 |                        |
|-----------------|------------------------|
| UAS-R Primary   | CCTGCAGGTCGGAGTACTGT   |
| UAS-F Primary   | GCGCTCGCTAGAGTCTCC     |
| TTAA-F Primary  | TCCGGCCTTTATTACATTC    |
| TTAA-R Primary  | GGCTAAATACGGAAGGATCTGA |
| UAS-R           | GAGACTCTAGCGAGCGCAAC   |
| UAS-F           | ACCTGCAGGCATGGAAGC     |
| TTAA-F          | GCGTGTTACGGTGAAAACCT   |
| TTAA-R          | CAAAGGGAAAACCTGTCCAATG |
| PB 5TRE Primary | CGACTACGCACTAGCCAACA   |
| PB 5TRE         | ACGGATTCGCGCTATTTAGA   |
| PB 3TRE Primary | GGTGCACGAGGTAAGAGAGG   |
| PB 3TRE         | CCGATAAAACACATGCGTCA   |

**Table S2: nrLAM PCR Primers**

|                         |                                                  |
|-------------------------|--------------------------------------------------|
| 5'TRE Linear1           | CGACTACGCACTAGCCAACA                             |
| 5'TRE Linear2           | CACGCGGTCGTTATAGTTCA                             |
| 3'TRE Linear1           | GGTGCACGAGGTAAGAGAGG                             |
| 3'TRE Linear2           | TGTCTGGGAGTCCCTCTCAC                             |
| 5'TRE Primary           | CTTACCGCATTGACAAGCAC                             |
| 3'TRE Primary           | GGGAGTCCCTCTCACCAA                               |
| Linker Primary          | GACCCGGGAGATCTGAATTC                             |
| 5'TRE For Nested        | ACGGATTCGCGCTATTTAGA                             |
| 3'TRE Rev Nested        | CCGATAAAACACATGCGTCA                             |
| Linker Nested           | AGTGGCACAGCAGTTAGG                               |
| Single stranded adaptor | 5'-P-CCTAACTGCTGTGCCACTGAATTCAGATCTCCCGGGTddC-3' |

**Table S3: Position weight matrix of Gal4**

|          | 1 | 2 | 3 | 4 | 5 | 6 | 7 | 8 | 9 | 10 | 11 | 12 | 13 | 14 | 15 | 16 | 17 |
|----------|---|---|---|---|---|---|---|---|---|----|----|----|----|----|----|----|----|
| <b>A</b> | 0 | 0 | 0 | ¼ | . | . | . | . | . | .  | .  | .  | .  | ¼  | 0  | 0  | 0  |
| <b>C</b> | 1 | 0 | 0 | ¼ | . | . | . | . | . | .  | .  | .  | .  | ¼  | 1  | 1  | 0  |
| <b>G</b> | 0 | 1 | 1 | ¼ | . | . | . | . | . | .  | .  | .  | .  | ¼  | 0  | 0  | 1  |
| <b>T</b> | 0 | 0 | 0 | ¼ | . | . | . | . | . | .  | .  | .  | .  | ¼  | 0  | 0  | 0  |
